# Supplementary material for: Mitochondrial genome sequencing and phylogeny of Haemagogus albomaculatus, Haemagogus leucocelaenus, Haemagogus spegazzinii, and Haemagogus tropicalis (Diptera: Culicidae)
Source: Springer Nature journal article supplement (doi:10.1038/s41598-020-73790-x), 2020-10-12
Supplement: 41598_2020_73790_MOESM1_ESM.pdf [file 41598_2020_73790_MOESM1_ESM.pdf]

**Supplementary information of**

**Sequencing mitochondrial genome and phylogenetic considerations of *Haemagogus albomaculatus*, *Haemagogus leucocelaenus*, *Haemagogus spegazzinii*, and *Haemagogus tropicalis* (Diptera: Culicidae)**

Fábio Silva da Silva, Ana Cecília Ribeiro Cruz, Daniele Barbosa de Almeida Medeiros, Sandro Patroca da Silva, Márcio Roberto Teixeira Nunes, Lívia Carício Martins, Jennifer Chiang Oliveira, Poliana da Silva Lemos, Gabriel Muricy Cunha, Renato Freitas de Araujo, Joaquim Pinto Nunes Neto

**Supplementary Table 1. Collection information of the analyzed *Haemagogus* species.**

**Supplementary Table 2. List of taxa used in the phylogenetic analyzes of this study.**

**Supplementary Table 3. Organization of *Hg. albomaculatus* mitogenome.**

**Supplementary Table 4. Organization of *Hg. leucocelaenus* mitogenome.**

**Supplementary Table 5. Organization of *Hg. spegazzinii* mitogenome.**

**Supplementary Table 6. Organization of *Hg. tropicalis* mitogenome.**

**Supplementary Table 7. Composition and skewness of sequenced *Haemagogus***

**mitogenomes.** Composition and skewness in whole mitogenomes and concatenated PCGs, tRNAs, and rRNAs (A). AT% content in PCGs codons positions (B).

**Supplementary Table 8. Relative synonymous codon usage (RSCU) in sequenced**

***Haemagogus* mitogenomes.**

**Supplementary Table 9. Matrix of nucleotide distances between the taxa used in this**

**study, built by Maximum Composite Likelihood.**

**Supplementary Figure 1. Predicted secondary structure of tRNAs of *Hg. albomaculatus*.**

**Supplementary Figure 2. Predicted secondary structure of tRNAs of *Hg. leucocelaenus*.**

**Supplementary Figure 3. Predicted secondary structure of tRNAs of *Hg. spegazzinii*.**

**Supplementary Figure 4. Predicted secondary structure of tRNAs of *Hg. tropicalis*.**

**Supplementary Figure 5. Phylogenetic reconstruction by the Bayesian Inference**

**method, based on the concatenation of the 13 PCGs of the *Haemagogus* species sequenced in this study and 23 other taxa with data available on GenBank database.** The subsequent Bayesian probabilities (BP) are shown on the left, in each node. The complementary lines dotted in red indicate the newly-sequenced species.

**Supplementary Figure 6. Phylogenetic reconstruction by the Maximum Likelihood**

**methods, based on the concatenation of the 13 PCGs of the *Haemagogus* species sequenced in this study and 23 other taxa with data available on GenBank database.** The values of support for bootstrapping (BPP) for 1,000 replicates are shown on the left, in each node. The complementary lines dotted in red indicate the newly-sequenced species.

**Supplementary Figure 7. Phylogenetic reconstruction by the Bayesian Inference**

**method, based on the concatenation of the genes *ATP8*, *COI*, *ND5*, and *ND6* of the *Haemagogus* species sequenced in this study and 03 other taxa with data available on GenBank database.** The subsequent Bayesian probabilities (BP) are shown on the left, in each node. The complementary lines dotted in red indicate the newly-sequenced species.

**Supplementary Figure 8. Phylogenetic reconstruction by the Maximum Likelihood**

**methods, based on the concatenation of the genes *ATP8*, *COI*, *ND5*, and *ND6* of the *Haemagogus* species sequenced in this study and 03 other taxa with data available on GenBank database.** The values of support for bootstrapping (BPP) for 1,000 replicates are shown on the left, in each node. The complementary lines dotted in red indicate the newly-sequenced species.

**Supplementary Table 1. Collection information of the analyzed *Haemagogus* species.**

| Species                               | ID Code   | Collected | Used | Sex | Collection location | State | Geographic coordinates  | Year |
|---------------------------------------|-----------|-----------|------|-----|---------------------|-------|-------------------------|------|
| <sup>1</sup> <i>Hg. albomaculatus</i> | AR_795522 | 5         | *    | ♀   | Jaborandi           | Bahia | S 13°58'92" W 44°53'36" | 2013 |
| <sup>2</sup> <i>Hg. leucocelaenus</i> | AR_847534 | 23        | 7    | ♀   | Canaã dos Carajás   | Pará  | S 06°49'75" W 49°87'83" | 2016 |
| <sup>1</sup> <i>Hg. spegazzinii</i>   | AR_843225 | 30        | *    | ♀   | Coribe              | Bahia | S 13°82'94" W 44°44'92" | 2016 |
| <sup>3</sup> <i>Hg. tropicalis</i>    | AR_854398 | 6         | 4    | ♀   | Ilha do Combu       | Pará  | S 01°51'97" W 48°49'28" | 2018 |

<sup>1</sup>Authorization number for collection: Not applicable.

<sup>2</sup>Authorization number for collection: MMA/ICMBio/Carajás National Forest/Direct authorization nº 021/2018

<sup>3</sup>Authorization number for collection: MMA/ICMBio/SISBIO authorization nº 60595-1

\* Macerated samples gently provided for total DNA extraction, after performing routine viral isolation procedures.

**Supplementary Table 2. List of taxa used in the phylogenetic analyzes of this study.**

| Species used and taxonomic information | Size (bp) | GenBank ID | Reference                               |
|----------------------------------------|-----------|------------|-----------------------------------------|
| <b>Culicidae Family</b>                |           |            |                                         |
| <b>Culicinae Subfamily</b>             |           |            |                                         |
| <b>Aedini Tribe</b>                    |           |            |                                         |
| <b><i>Haemagogus</i> Genus</b>         |           |            |                                         |
| <b><i>Conopstegus</i> Subgenus</b>     |           |            |                                         |
| <i>Haemagogus leucocelaenus</i>        | 15056     | MN531847   | This study                              |
| <b><i>Haemagogus</i> Subgenus</b>      |           |            |                                         |
| <b>Albomaculatus Section</b>           |           |            |                                         |
| <i>Haemagogus albomaculatus</i>        | 15097     | MN531846   | This study                              |
| <i>Haemagogus janthinomys</i>          | 15698     | NC_028025  | Lemos <i>et al.</i> <sup>1</sup>        |
| <i>Haemagogus spegazzinii</i>          | 15081     | MN531848   | This study                              |
| <b>Tropicalis Section</b>              |           |            |                                         |
| <i>Haemagogus tropicalis</i>           | 14917     | MN531849   | This study                              |
| <b><i>Aedes</i> Genus</b>              |           |            |                                         |
| <b><i>Stegomyia</i> Subgenus</b>       |           |            |                                         |
| <i>Aedes aegypti</i>                   | 16790     | NC_035159  | Matthews <i>et al.</i> <sup>2</sup>     |
| <i>Aedes albopictus</i>                | 16665     | NC_006817  | Direct Submission                       |
| <b><i>Psorophora</i> Genus</b>         |           |            |                                         |
| <b><i>Janthinosoma</i> Subgenus</b>    |           |            |                                         |
| <i>Psorophora ferox</i>                | 15345     | MK575485   | Direct Submission                       |
| <b><i>Psorophora</i> Subgenus</b>      |           |            |                                         |
| <i>Psorophora saeva</i>                | 15049     | NC_044658  | Direct Submission                       |
| <b>Culicini Tribe</b>                  |           |            |                                         |
| <b><i>Culex</i> Genus</b>              |           |            |                                         |
| <b><i>Culex</i> Subgenus</b>           |           |            |                                         |
| <i>Culex camposi</i>                   | 15570     | NC_036008  | Demari-Silva <i>et al.</i> <sup>3</sup> |
| <i>Culex coronator</i>                 | 15576     | NC_036006  | Demari-Silva <i>et al.</i> <sup>3</sup> |
| <i>Culex pipiens pipiens</i>           | 14856     | NC_015079  | Direct Submission                       |
| <i>Culex quinquefasciatus</i>          | 15587     | NC_014574  | Behura <i>et al.</i> <sup>4</sup>       |
| <b><i>Lutzia</i> Genus</b>             |           |            |                                         |
| <b><i>Metalutzia</i> Subgenus</b>      |           |            |                                         |
| <i>Lutzia fuscus</i>                   | 15803     | MH316118   | Sun <i>et al.</i> <sup>5</sup>          |
| <i>Lutzia halifaxii</i>                | 15744     | MH316119   | Sun <i>et al.</i> <sup>5</sup>          |
| <b>Sabethini Tribe</b>                 |           |            |                                         |
| <b><i>Sabethes</i> Genus</b>           |           |            |                                         |
| <b><i>Peytonulus</i> Subgenus</b>      |           |            |                                         |
| <i>Sabethes undosus</i>                | 15334     | NC_044660  | Lorenz <i>et al.</i> <sup>6</sup>       |
| <b><i>Sabethes</i> Subgenus</b>        |           |            |                                         |

|                                  |       |           |                                        |
|----------------------------------|-------|-----------|----------------------------------------|
| <i>Sabethes belisarioi</i>       | 15911 | NC_037498 | Aragão <i>et al.</i> <sup>7</sup>      |
| <b>Sabethoides Subgenus</b>      |       |           |                                        |
| <i>Sabethes chloropterus</i>     | 15609 | NC_037499 | Aragão <i>et al.</i> <sup>7</sup>      |
| <i>Sabethes glaucodaemon</i>     | 15620 | NC_037500 | Aragão <i>et al.</i> <sup>7</sup>      |
| <b>Anophelinae Subfamily</b>     |       |           |                                        |
| <b>Anopheles Genus</b>           |       |           |                                        |
| <b>Anopheles Subgenus</b>        |       |           |                                        |
| <i>Anopheles quadrimaculatus</i> | 15455 | NC_000875 | Mitchell <i>et al.</i> <sup>8</sup>    |
| <b>Cellia Subgenus</b>           |       |           |                                        |
| <i>Anopheles gambiae</i>         | 15363 | NC_002084 | Beard <i>et al.</i> <sup>9</sup>       |
| <b>Kerteszia Subgenus</b>        |       |           |                                        |
| <i>Anopheles bellator</i>        | 15668 | NC_030249 | Oliveira <i>et al.</i> <sup>10</sup>   |
| <i>Anopheles cruzii</i>          | 15449 | NC_024740 | Direct Submission                      |
| <i>Anopheles homunculus</i>      | 15739 | NC_030248 | Oliveira <i>et al.</i> <sup>10</sup>   |
| <b>Nyssorhynchus Subgenus</b>    |       |           |                                        |
| <i>Anopheles albitarsis</i>      | 15413 | NC_020662 | Krzywinski <i>et al.</i> <sup>11</sup> |
| <i>Anopheles darlingi</i>        | 15386 | NC_014275 | Moreno <i>et al.</i> <sup>12</sup>     |
| <b>Dixidae Family (Outgroup)</b> |       |           |                                        |
| <i>Dixella aestivalis</i>        | 16465 | NC_029354 | Briscoe <i>et al.</i> <sup>13</sup>    |

## References

1. Lemos, P. S. *et al.* Characterization of mitochondrial genome of *Haemagogus janthinomys* (Diptera: Culicidae). *Mitochondrial DNA Part A DNA Mapping, Seq. Anal.* **28**, 50–51 (2017).
2. Matthews, B. J. *et al.* Improved reference genome of *Aedes aegypti* informs arbovirus vector control. *Nature* **563**, 501–507 (2018).
3. Demari-Silva, B. *et al.* Mitochondrial genomes and comparative analyses of *Culex camposi*, *Culex coronator*, *Culex usquatus* and *Culex usquatissimus* (Diptera:Culicidae), members of the coronator group. *BMC Genomics* **16**, 831 (2015).
4. Behura, S. K. *et al.* Complete sequences of mitochondria genomes of *Aedes aegypti* and *Culex quinquefasciatus* and comparative analysis of mitochondrial dna fragments inserted in the nuclear genomes. *Insect Biochem. Mol. Biol.* **41**, 770–777 (2011).
5. Sun, L. *et al.* The complete mt genomes of *Lutzia halifaxia*, *Lt. fuscus* and *Culex*

- pallidothorax* (Diptera: Culicidae) and comparative analysis of 16 *Culex* and *Lutzia* mt genome sequences. *Parasites and Vectors* **12**, 368 (2019).
6. Lorenz, C., Alves, J. M. P., Foster, P. G., Sallum, M. A. M. & Suesdek, L. First record of translocation in Culicidae (Diptera) mitogenomes: Evidence from the tribe Sabethini. *BMC Genomics* **20**, 721 (2019).
  7. Aragão, A. O. *et al.* Description and phylogeny of the mitochondrial genome of *Sabethes chloropterus*, *Sabethes glaucodaemon* and *Sabethes belisarioi* (Diptera: Culicidae). *Genomics* **111**, 607–611 (2019).
  8. Mitchell, S. E., Cockburn, A. F. & Seawright, J. A. The mitochondrial genome of *Anopheles quadrimaculatus* species A: Complete nucleotide sequence and gene organization. *Genome* **36**, 1058–1073 (1993).
  9. Beard, C. B., Hamm, D. M. & Collins, F. H. The mitochondrial genome of the mosquito *Anopheles gambiae*: DNA sequence, genome organization, and comparisons with mitochondrial sequences of other insects. *Insect Mol. Biol.* **2**, 103–124 (1993).
  10. Oliveira, T. M. P. *et al.* Mitochondrial Genomes of *Anopheles (Kerteszia)* (Diptera: Culicidae) from the Atlantic Forest, Brazil. *J. Med. Entomol.* **53**, 790–797 (2016).
  11. Krzywinski, J. *et al.* Analysis of the evolutionary forces shaping mitochondrial genomes of a Neotropical malaria vector complex. *Mol. Phylogenet. Evol.* **58**, 469–477 (2011).
  12. Moreno, M. *et al.* Complete mtDNA genomes of *Anopheles darlingi* and an approach to anopheline divergence time. *Malar. J.* **9**, 127 (2010).
  13. Briscoe, A. G., Sivell, D. & Harbach, R. E. The complete mitochondrial genome of *Dixella aestivalis* (Diptera: Nematocera: Dixidae). *Mitochondrial DNA Part A DNA Mapping, Seq. Anal.* **28**, 83–84 (2017).

**Supplementary Table 3. Organization of *Hg. albomaculatus* mitogenome.**

| <i>Haemagogus albomaculatus</i> |        |          |       |           |     |           |                  |      |         |         |
|---------------------------------|--------|----------|-------|-----------|-----|-----------|------------------|------|---------|---------|
| Gene                            | Strand | Position |       | Size (pb) | IGN | Anticodon | Start/Stop Codon | AT%  | AT-skew | GC-skew |
|                                 |        | Start    | End   |           |     |           |                  |      |         |         |
| Ile (I)                         | J      | 1        | 68    | 68        | 0   | GAU       |                  | 75.0 | 0.0588  | 0.1765  |
| Gln (Q)                         | N      | 66       | 134   | 69        | -3  | UUG       |                  | 81.2 | -0.0714 | 0.3846  |
| Met (M)                         | J      | 134      | 202   | 69        | -1  | CAU       |                  | 72.5 | -0.0400 | -0.1579 |
| ND2                             | J      | 224      | 1186  | 963       | 21  |           | ATA/TAA          | 83.4 | -0.1059 | -0.1375 |
| Trp (W)                         | J      | 1234     | 1302  | 69        | 47  | UCA       |                  | 76.8 | 0.0943  | -0.1250 |
| Cys (C)                         | N      | 1302     | 1368  | 67        | -1  | GCA       |                  | 83.6 | 0.0714  | 0.0909  |
| Tyr (Y)                         | N      | 1369     | 1436  | 68        | 0   | GUA       |                  | 79.4 | 0.0741  | 0.4286  |
| COI                             | J      | 1441     | 2949  | 1509      | 4   |           | ATT/TAA          | 71.4 | -0.1484 | -0.0116 |
| Leu (L2)                        | J      | 2972     | 3038  | 67        | 22  | UAA       |                  | 77.6 | -0.0385 | 0.2000  |
| COII                            | J      | 3040     | 3714  | 675       | 1   |           | ATG/TAA          | 77.5 | -0.1205 | -0.0526 |
| Lys (K)                         | J      | 3725     | 3795  | 71        | 10  | CUU       |                  | 73.2 | 0.0769  | -0.0526 |
| Asp (D)                         | J      | 3805     | 3874  | 70        | 9   | GUC       |                  | 87.1 | 0.0820  | -0.1111 |
| ATP8                            | J      | 3875     | 4033  | 159       | 0   |           | ATT/TAA          | 84.9 | -0.0963 | -0.4167 |
| ATP6                            | J      | 4030     | 4701  | 672       | -4  |           | TTG/TAA          | 76.5 | -0.1206 | -0.1519 |
| COIII                           | J      | 4714     | 5499  | 786       | 12  |           | ATG/TAA          | 73.3 | -0.1597 | -0.0095 |
| Gly (G)                         | J      | 5502     | 5568  | 67        | 2   | UCC       |                  | 80.6 | 0.0370  | 0.0769  |
| ND3                             | J      | 5587     | 5913  | 327       | 18  |           | ATA/TAA          | 79.8 | -0.1648 | -0.0303 |
| Arg (R)                         | J      | 5924     | 5988  | 65        | 10  | UCG       |                  | 67.7 | -0.1364 | 0.0476  |
| Ala (A)                         | J      | 5993     | 6059  | 67        | 4   | UGC       |                  | 85.1 | -0.0526 | 0.2000  |
| Asn (N)                         | J      | 6061     | 6130  | 70        | 1   | GUU       |                  | 78.6 | 0.0545  | 0.0667  |
| Ser (S1)                        | N      | 6129     | 6195  | 67        | -2  | GCU       |                  | 76.1 | -0.0980 | 0.0000  |
| Glu (E)                         | J      | 6212     | 6277  | 66        | 16  | UUC       |                  | 90.9 | 0.0333  | -0.3333 |
| Phe (F)                         | N      | 6292     | 6358  | 67        | 14  | GAA       |                  | 80.6 | -0.0370 | 0.5385  |
| ND5                             | N      | 6379     | 8067  | 1689      | 20  |           | ATC/TAA          | 80.3 | -0.1466 | 0.2530  |
| His (H)                         | N      | 8107     | 8171  | 65        | 39  | GUG       |                  | 81.5 | -0.1321 | 0.5000  |
| ND4                             | N      | 8188     | 9522  | 1335      | 16  |           | ATT/TAA          | 80.2 | -0.1821 | 0.2727  |
| ND4L                            | N      | 9519     | 9797  | 279       | -4  |           | ATC/TAA          | 83.9 | -0.2308 | 0.3333  |
| Thr (T)                         | J      | 9815     | 9879  | 65        | 17  | UGU       |                  | 87.7 | 0.0526  | 0.0000  |
| Pro (P)                         | N      | 9880     | 9946  | 67        | 0   | UGG       |                  | 77.6 | 0.0769  | 0.4667  |
| ND6                             | J      | 9952     | 10455 | 504       | 5   |           | ATA/TAA          | 86.9 | -0.1324 | -0.0909 |
| CytB                            | J      | 10467    | 11573 | 1107      | 11  |           | ATT/TAA          | 75.7 | -0.1599 | -0.0260 |
| Ser (S2)                        | J      | 11602    | 11669 | 68        | 28  | UGA       |                  | 82.4 | 0.0714  | 0.1667  |
| ND1                             | N      | 11705    | 12616 | 912       | 35  |           | ATA/TAA          | 78.0 | -0.2405 | 0.2736  |
| Leu (L1)                        | N      | 12647    | 12715 | 69        | 30  | UAG       |                  | 85.5 | -0.0508 | 0.4000  |
| rRNA 16S                        | N      | 12693    | 14052 | 1360      | -23 |           |                  | 83.2 | -0.0618 | 0.2982  |
| Val (V)                         | N      | 14055    | 14126 | 72        | 2   | UAC       |                  | 80.6 | 0.0690  | 0.1429  |
| rRNA 12S                        | N      | 14126    | 14918 | 793       | -1  |           |                  | 81.6 | -0.0325 | 0.2466  |
| *                               | -      | 14919    | 15097 | 179       | -   | -         | -                | -    | -       | -       |

**Supplementary Table 4. Organization of *Hg. leucocelaenus* mitogenome.**

| <i>Haemagogus leucocelaenus</i> |        |          |       |           |     |           |                  |      |         |         |
|---------------------------------|--------|----------|-------|-----------|-----|-----------|------------------|------|---------|---------|
| Gene                            | Strand | Position |       | Size (pb) | IGN | Anticodon | Start/Stop Codon | AT%  | AT-skew | GC-skew |
|                                 |        | Start    | End   |           |     |           |                  |      |         |         |
| Ile (I)                         | J      | 1        | 67    | 67        | 0   | GAU       |                  | 74.6 | 0.0000  | 0.1765  |
| Gln (Q)                         | N      | 65       | 133   | 69        | -3  | UUG       |                  | 82.6 | -0.0877 | 0.3333  |
| Met (M)                         | J      | 133      | 201   | 69        | -1  | CAU       |                  | 71.0 | -0.1020 | -0.2000 |
| ND2                             | J      | 223      | 1209  | 987       | 21  |           | ATA/TAA          | 83.5 | -0.1238 | -0.1534 |
| Trp (W)                         | J      | 1235     | 1303  | 69        | 25  | UCA       |                  | 81.2 | 0.0357  | -0.0769 |
| Cys (C)                         | N      | 1303     | 1369  | 67        | -1  | GCA       |                  | 83.6 | 0.1071  | 0.0909  |
| Tyr (Y)                         | N      | 1370     | 1436  | 67        | 0   | GUA       |                  | 80.6 | 0.0741  | 0.3846  |
| COI                             | J      | 1441     | 2949  | 1509      | 4   |           | ATT/TAA          | 71.2 | -0.1312 | -0.0369 |
| Leu (L2)                        | J      | 2972     | 3038  | 67        | 22  | UAA       |                  | 77.6 | 0.0000  | 0.2000  |
| COII                            | J      | 3040     | 3720  | 681       | 1   |           | ATG/TAA          | 75.6 | -0.0796 | -0.1807 |
| Lys (K)                         | J      | 3725     | 3795  | 71        | 4   | CUU       |                  | 74.6 | 0.0943  | 0.0000  |
| Asp (D)                         | J      | 3812     | 3880  | 69        | 16  | GUC       |                  | 87.0 | 0.0667  | -0.1111 |
| ATP8                            | J      | 3882     | 4040  | 159       | 1   |           | ATT/TAA          | 82.4 | -0.0382 | -0.4286 |
| ATP6                            | J      | 4037     | 4708  | 672       | -4  |           | TTG/TAA          | 74.9 | -0.1213 | -0.2189 |
| COIII                           | J      | 4721     | 5506  | 786       | 12  |           | ATG/TAA          | 72.0 | -0.1378 | -0.0818 |
| Gly (G)                         | J      | 5509     | 5575  | 67        | 2   | UCC       |                  | 79.1 | 0.0566  | 0.0000  |
| ND3                             | J      | 5594     | 5920  | 327       | 18  |           | ATA/TAA          | 79.8 | -0.1648 | -0.0303 |
| Arg (R)                         | J      | 5931     | 5994  | 64        | 10  | UCG       |                  | 70.3 | -0.0667 | -0.0526 |
| Ala (A)                         | J      | 5999     | 6065  | 67        | 4   | UGC       |                  | 79.1 | -0.0189 | 0.2857  |
| Asn (N)                         | J      | 6067     | 6136  | 70        | 1   | GUU       |                  | 80.0 | 0.1429  | 0.1429  |
| Ser (S1)                        | N      | 6135     | 6201  | 67        | -2  | GCU       |                  | 73.1 | -0.0612 | 0.0000  |
| Glu (E)                         | J      | 6210     | 6275  | 66        | 8   | UUC       |                  | 90.9 | 0.0333  | -0.3333 |
| Phe (F)                         | N      | 6278     | 6344  | 67        | 2   | GAA       |                  | 83.6 | 0.0000  | 0.6364  |
| ND5                             | N      | 6369     | 8054  | 1686      | 24  |           | ATC/TAA          | 79.7 | -0.1780 | 0.3178  |
| His (H)                         | N      | 8094     | 8158  | 65        | 39  | GUG       |                  | 81.5 | -0.0566 | 0.5000  |
| ND4                             | N      | 8178     | 9509  | 1332      | 19  |           | ATT/TAA          | 79.7 | -0.2064 | 0.3284  |
| ND4L                            | N      | 9506     | 9784  | 279       | -4  |           | ATC/TAA          | 81.4 | -0.2863 | 0.4615  |
| Thr (T)                         | J      | 9802     | 9866  | 65        | 17  | UGU       |                  | 87.7 | 0.0526  | 0.0000  |
| Pro (P)                         | N      | 9867     | 9933  | 67        | 0   | UGG       |                  | 77.6 | 0.0385  | 0.4667  |
| ND6                             | J      | 9939     | 10442 | 504       | 5   |           | ATA/TAA          | 84.7 | -0.1101 | -0.3247 |
| CytB                            | J      | 10475    | 11560 | 1086      | 32  |           | ATT/TAA          | 74.1 | -0.1404 | -0.0961 |
| Ser (S2)                        | J      | 11590    | 11655 | 66        | 29  | UGA       |                  | 80.3 | 0.0943  | 0.0769  |
| ND1                             | N      | 11682    | 12614 | 933       | 26  |           | ATA/TAA          | 78.1 | -0.2455 | 0.2941  |
| Leu (L1)                        | N      | 12624    | 12691 | 68        | 9   | UAG       |                  | 85.3 | 0.0000  | 0.4000  |
| rRNA 16S                        | N      | 12664    | 14028 | 1365      | -28 |           |                  | 82.9 | -0.0583 | 0.2704  |
| Val (V)                         | N      | 14027    | 14098 | 72        | -2  | UAC       |                  | 80.6 | 0.0345  | 0.1429  |
| rRNA 12S                        | N      | 14098    | 14889 | 792       | -1  |           |                  | 81.7 | -0.0386 | 0.2552  |
| *                               | -      | 14890    | 15056 | 167       | -   | -         | -                | -    | -       | -       |



**Supplementary Table 5. Organization of *Hg. spegazzinii* mitogenome.**

| <i>Haemagogus spegazzinii</i> |        |          |       |           |     |           |                  |      |         |         |
|-------------------------------|--------|----------|-------|-----------|-----|-----------|------------------|------|---------|---------|
| Gene                          | Strand | Position |       | Size (pb) | IGN | Anticodon | Start/Stop Codon | AT%  | AT-skew | GC-skew |
|                               |        | Start    | End   |           |     |           |                  |      |         |         |
| Ile (I)                       | J      | 1        | 68    | 68        | 0   | GAU       |                  | 75.0 | 0.0588  | 0.1765  |
| Gln (Q)                       | N      | 66       | 134   | 69        | -3  | UUG       |                  | 81.2 | -0.0357 | 0.3846  |
| Met (M)                       | J      | 134      | 202   | 69        | -1  | CAU       |                  | 72.5 | -0.0400 | -0.1579 |
| ND2                           | J      | 224      | 1210  | 987       | 21  |           | ATA/TAA          | 84.1 | -0.1084 | -0.0446 |
| Trp (W)                       | J      | 1234     | 1302  | 69        | 23  | UCA       |                  | 78.3 | 0.0741  | -0.0667 |
| Cys (C)                       | N      | 1302     | 1368  | 67        | -1  | GCA       |                  | 80.6 | 0.0741  | 0.2308  |
| Tyr (Y)                       | N      | 1369     | 1436  | 68        | 0   | GUA       |                  | 79.4 | 0.0741  | 0.4286  |
| COI                           | J      | 1441     | 2949  | 1509      | 4   |           | ATT/TAA          | 70.8 | -0.1581 | -0.0136 |
| Leu (L2)                      | J      | 2972     | 3038  | 67        | 22  | UAA       |                  | 76.1 | -0.0588 | 0.1250  |
| COII                          | J      | 3040     | 3714  | 675       | 1   |           | ATG/TAA          | 76.3 | -0.1068 | -0.0875 |
| Lys (K)                       | J      | 3725     | 3795  | 71        | 10  | CUU       |                  | 73.2 | 0.0769  | -0.0526 |
| Asp (D)                       | J      | 3810     | 3878  | 69        | 14  | GUC       |                  | 87.0 | 0.0667  | -0.1111 |
| ATP8                          | J      | 3879     | 4037  | 159       | 0   |           | ATT/TAA          | 84.9 | -0.1259 | -0.4167 |
| ATP6                          | J      | 4034     | 4705  | 672       | -4  |           | TTG/TAA          | 76.6 | -0.1223 | -0.1592 |
| COIII                         | J      | 4718     | 5503  | 786       | 12  |           | ATG/TAA          | 72.9 | -0.1658 | 0.0047  |
| Gly (G)                       | J      | 5506     | 5572  | 67        | 2   | UCC       |                  | 80.6 | 0.0000  | 0.0769  |
| ND3                           | J      | 5588     | 5917  | 330       | 15  |           | ATA/TAA          | 80.9 | -0.1760 | 0.0159  |
| Arg (R)                       | J      | 5928     | 5991  | 64        | 10  | UCG       |                  | 68.8 | -0.0455 | 0.0000  |
| Ala (A)                       | J      | 5996     | 6062  | 67        | 4   | UGC       |                  | 82.1 | -0.0182 | 0.0000  |
| Asn (N)                       | J      | 6064     | 6132  | 69        | 1   | GUU       |                  | 78.3 | 0.1481  | 0.0667  |
| Ser (S1)                      | N      | 6131     | 6197  | 67        | -2  | GCU       |                  | 76.1 | -0.0980 | 0.0000  |
| Glu (E)                       | J      | 6217     | 6282  | 66        | 19  | UUC       |                  | 90.9 | 0.0333  | -0.3333 |
| Phe (F)                       | N      | 6290     | 6356  | 67        | 7   | GAA       |                  | 80.6 | 0.0370  | 0.3846  |
| ND5                           | N      | 6377     | 8065  | 1689      | 20  |           | ATC/TAA          | 79.0 | -0.1416 | 0.2486  |
| His (H)                       | N      | 8105     | 8169  | 65        | 39  | GUG       |                  | 81.5 | -0.0943 | 0.5000  |
| ND4                           | N      | 8186     | 9520  | 1335      | 16  |           | ATT/TAA          | 80.4 | -0.1892 | 0.2824  |
| ND4L                          | N      | 9517     | 9795  | 279       | -4  |           | ATC/TAA          | 83.2 | -0.2500 | 0.2766  |
| Thr (T)                       | J      | 9813     | 9877  | 65        | 17  | UGU       |                  | 87.7 | 0.0877  | 0.0000  |
| Pro (P)                       | N      | 9878     | 9944  | 67        | 0   | UGG       |                  | 77.6 | 0.0769  | 0.4667  |
| ND6                           | J      | 9950     | 10453 | 504       | 5   |           | ATA/TAA          | 86.7 | -0.0709 | -0.1642 |
| CytB                          | J      | 10465    | 11571 | 1107      | 11  |           | ATT/TAA          | 74.6 | -0.1598 | -0.0036 |
| Ser (S2)                      | J      | 11600    | 11665 | 66        | 28  | UGA       |                  | 81.8 | 0.0741  | 0.1667  |
| ND1                           | N      | 11711    | 12628 | 918       | 45  |           | ATA/TAA          | 79.1 | -0.2204 | 0.2500  |
| Leu (L1)                      | N      | 12638    | 12705 | 68        | 9   | UAG       |                  | 85.3 | -0.0345 | 0.4000  |
| rRNA 16S                      | N      | 12672    | 14029 | 1358      | -34 |           |                  | 83.1 | -0.0487 | 0.2926  |
| Val (V)                       | N      | 14042    | 14113 | 72        | 12  | UAC       |                  | 80.6 | 0.0690  | 0.1429  |
| rRNA 12S                      | N      | 14113    | 14906 | 794       | -1  |           |                  | 81.2 | -0.0295 | 0.2617  |
| *                             | -      | 14907    | 15081 | 175       | -   | -         | -                | -    | -       | -       |

**Supplementary Table 6. Organization of *Hg. tropicalis* mitogenome.**

| <i>Haemagogus tropicalis</i> |        |          |       |           |     |           |                  |      |         |         |
|------------------------------|--------|----------|-------|-----------|-----|-----------|------------------|------|---------|---------|
| Gene                         | Strand | Position |       | Size (pb) | IGN | Anticodon | Start/Stop Codon | AT%  | AT-skew | GC-skew |
|                              |        | Start    | End   |           |     |           |                  |      |         |         |
| Ile (I)                      | J      | 1        | 67    | 67        | 0   | GAU       |                  | 74.6 | 0.0800  | 0.1765  |
| Gln (Q)                      | N      | 68       | 136   | 69        | 0   | UUG       |                  | 82.6 | -0.0877 | 0.3333  |
| Met (M)                      | J      | 136      | 204   | 69        | -1  | CAU       |                  | 71.0 | -0.0612 | -0.2000 |
| ND2                          | J      | 226      | 1212  | 987       | 21  |           | ATA/TAA          | 84.2 | -0.1047 | -0.0769 |
| Trp (W)                      | J      | 1236     | 1304  | 69        | 23  | UCA       |                  | 82.6 | 0.1228  | -0.1667 |
| Cys (C)                      | N      | 1304     | 1370  | 67        | -1  | GCA       |                  | 83.6 | 0.0357  | 0.0909  |
| Tyr (Y)                      | N      | 1371     | 1438  | 68        | 0   | GUA       |                  | 80.9 | 0.0909  | 0.3846  |
| COI                          | J      | 1443     | 2951  | 1509      | 4   |           | ATT/TAA          | 72.2 | -0.1111 | -0.0190 |
| Leu (L2)                     | J      | 2974     | 3040  | 67        | 22  | UAA       |                  | 79.1 | -0.0566 | 0.1429  |
| COII                         | J      | 3043     | 3714  | 672       | 2   |           | ATT/TAA          | 76.0 | -0.0646 | -0.1429 |
| Lys (K)                      | J      | 3728     | 3798  | 71        | 13  | CUU       |                  | 74.6 | 0.0943  | 0.0000  |
| Asp (D)                      | J      | 3812     | 3880  | 69        | 13  | GUC       |                  | 87.0 | 0.1000  | -0.1111 |
| ATP8                         | J      | 3881     | 4039  | 159       | 0   |           | ATT/TAA          | 83.0 | -0.0758 | -0.4815 |
| ATP6                         | J      | 4036     | 4707  | 672       | -4  |           | TTG/TAA          | 76.6 | -0.0990 | -0.1847 |
| COIII                        | J      | 4732     | 5505  | 774       | 24  |           | ATG/TAA          | 73.8 | -0.1454 | -0.0246 |
| Gly (G)                      | J      | 5508     | 5574  | 67        | 2   | UCC       |                  | 79.1 | 0.0566  | 0.0000  |
| ND3                          | J      | 5581     | 5919  | 339       | 6   |           | ATA/TAA          | 81.1 | -0.1709 | -0.0625 |
| Arg (R)                      | J      | 5927     | 5990  | 64        | 7   | UCG       |                  | 71.9 | -0.0870 | 0.0000  |
| Ala (A)                      | J      | 5997     | 6063  | 67        | 6   | UGC       |                  | 85.1 | -0.0175 | 0.2000  |
| Asn (N)                      | J      | 6065     | 6134  | 70        | 1   | GUU       |                  | 78.6 | 0.0545  | 0.0667  |
| Ser (S1)                     | N      | 6133     | 6199  | 67        | -2  | GCU       |                  | 74.6 | -0.1200 | 0.0588  |
| Glu (E)                      | J      | 6228     | 6293  | 66        | 28  | UUC       |                  | 92.4 | 0.1148  | -0.2000 |
| Phe (F)                      | N      | 6292     | 6358  | 67        | -2  | GAA       |                  | 86.6 | 0.0000  | 0.5556  |
| ND5                          | N      | 6379     | 8061  | 1683      | 20  |           | ATC/TAA          | 80.4 | -0.1530 | 0.2606  |
| His (H)                      | N      | 8107     | 8171  | 65        | 45  | GUG       |                  | 81.5 | -0.0943 | 0.5000  |
| ND4                          | N      | 8189     | 9523  | 1335      | 17  |           | ATG/TAA          | 81.5 | -0.1765 | 0.2227  |
| ND4L                         | N      | 9520     | 9786  | 267       | -4  |           | ATG/TAA          | 83.1 | -0.2613 | 0.4667  |
| Thr (T)                      | J      | 9816     | 9880  | 65        | 29  | UGU       |                  | 87.7 | 0.0526  | 0.0000  |
| Pro (P)                      | N      | 9881     | 9947  | 67        | 0   | UGG       |                  | 80.6 | 0.0000  | 0.5385  |
| ND6                          | J      | 9956     | 10459 | 504       | 8   |           | ATA/TAA          | 86.1 | -0.1014 | -0.2571 |
| CytB                         | J      | 10471    | 11595 | 1125      | 11  |           | ATG/TAA          | 75.1 | -0.1266 | -0.0500 |
| Ser (S2)                     | J      | 11610    | 11675 | 66        | 14  | UGA       |                  | 81.8 | 0.0370  | 0.1667  |
| ND1                          | N      | 11704    | 12615 | 912       | 28  |           | ATA/TAA          | 78.2 | -0.2482 | 0.2764  |
| Leu (L1)                     | N      | 12646    | 12713 | 68        | 30  | UAG       |                  | 85.3 | -0.0345 | 0.4000  |
| rRNA 16S                     | N      | 12680    | 14036 | 1357      | -34 |           |                  | 83.4 | -0.0495 | 0.2889  |
| Val (V)                      | N      | 14050    | 14121 | 72        | 13  | UAC       |                  | 80.6 | 0.0345  | 0.1429  |
| rRNA 12S                     | N      | 14121    | 14912 | 792       | -1  |           |                  | 82.2 | -0.0138 | 0.2624  |
| *                            | -      | 14913    | 14917 | 5         | -   | -         | -                | -    | -       | -       |

**Supplementary Table 7. Composition and skewness of sequenced *Haemagogus* mitogenomes.** Composition and skewness in whole mitogenomes and concatenated PCGs, tRNAs, and rRNAs (A). AT% content in PCGs codons positions (B).

**A**

| <b>Species</b>           | <b>Size (bp)</b> | <b>A%</b> | <b>T%</b> | <b>C%</b> | <b>G%</b> | <b>AT%</b> | <b>AT-Skew</b> | <b>GC-Skew</b> |
|--------------------------|------------------|-----------|-----------|-----------|-----------|------------|----------------|----------------|
| <b>Whole mitogenome</b>  |                  |           |           |           |           |            |                |                |
| <i>Hg. albomaculatus</i> | 15097            | 40.0      | 39.5      | 11.8      | 8.7       | 79.5       | 0.0055         | -0.1540        |
| <i>Hg. leucocelaenus</i> | 15056            | 40.0      | 38.8      | 12.7      | 8.5       | 78.8       | 0.0159         | -0.2005        |
| <i>Hg. spegazzinii</i>   | 15081            | 39.8      | 39.3      | 12.0      | 8.9       | 79.1       | 0.0059         | -0.1455        |
| <i>Hg. tropicalis</i>    | 14917            | 40.5      | 39.2      | 11.8      | 8.5       | 79.7       | 0.0160         | -0.1637        |
| Average                  | 15038            | 40.1      | 39.2      | 12.1      | 8.6       | 79.3       | 0.0108         | -0.1659        |
| <b>PCGs</b>              |                  |           |           |           |           |            |                |                |
| <i>Hg. albomaculatus</i> | 10917            | 33.0      | 45.2      | 10.3      | 11.5      | 78.2       | -0.1556        | 0.0589         |
| <i>Hg. leucocelaenus</i> | 10941            | 32.6      | 44.8      | 10.9      | 11.7      | 77.4       | -0.1574        | 0.0364         |
| <i>Hg. spegazzinii</i>   | 10950            | 33.0      | 44.9      | 10.3      | 11.7      | 77.9       | -0.1534        | 0.0625         |
| <i>Hg. tropicalis</i>    | 10938            | 33.7      | 44.8      | 10.4      | 11.2      | 78.4       | -0.1419        | 0.0386         |
| Average                  | 10937            | 33.1      | 44.9      | 10.5      | 11.5      | 78.0       | -0.1521        | 0.0491         |
| <b>tRNAs</b>             |                  |           |           |           |           |            |                |                |
| <i>Hg. albomaculatus</i> | 1493             | 40.5      | 39.6      | 8.6       | 11.4      | 80.0       | 0.0109         | 0.1409         |
| <i>Hg. leucocelaenus</i> | 1486             | 40.9      | 39.2      | 8.6       | 11.3      | 80.1       | 0.0218         | 0.1351         |
| <i>Hg. spegazzinii</i>   | 1487             | 40.9      | 38.9      | 8.8       | 11.4      | 79.8       | 0.0253         | 0.1296         |
| <i>Hg. tropicalis</i>    | 1487             | 41.2      | 39.8      | 8.3       | 10.8      | 81.0       | 0.0166         | 0.1307         |
| Average                  | 1488             | 40.9      | 39.4      | 8.6       | 11.2      | 80.2       | 0.0187         | 0.1341         |
| <b>rRNAs</b>             |                  |           |           |           |           |            |                |                |
| <i>Hg. albomaculatus</i> | 2153             | 39.2      | 43.4      | 6.3       | 11.1      | 82.6       | -0.0512        | 0.2781         |
| <i>Hg. leucocelaenus</i> | 2157             | 39.1      | 43.3      | 6.4       | 11.1      | 82.5       | -0.0512        | 0.2646         |
| <i>Hg. spegazzinii</i>   | 2152             | 39.5      | 42.9      | 6.3       | 11.2      | 82.4       | -0.0417        | 0.2804         |
| <i>Hg. tropicalis</i>    | 2149             | 40.0      | 43.0      | 6.1       | 10.9      | 83.0       | -0.0365        | 0.2787         |
| Average                  | 2153             | 39.4      | 43.2      | 6.3       | 11.1      | 82.6       | -0.0451        | 0.2754         |

**B**

| <b>Species</b>           | <b>AT% PCGs codons</b> |            |            |
|--------------------------|------------------------|------------|------------|
|                          | <b>1st</b>             | <b>2nd</b> | <b>3rd</b> |
| <i>Hg. albomaculatus</i> | 71,2                   | 67,4       | 96,1       |
| <i>Hg. leucocelaenus</i> | 71,0                   | 67,6       | 93,5       |
| <i>Hg. spegazzinii</i>   | 70,7                   | 67,3       | 95,7       |
| <i>Hg. tropicalis</i>    | 71,7                   | 68,0       | 95,6       |
| Average                  | 71,2                   | 67,6       | 95,2       |

**Supplementary Table 8. Relative synonymous codon usage (RSCU) in sequenced *Haemagogus* mitogenomes.**

| Amino acid      | Codons | <i>Hg. albomaculatus</i> |      | <i>Hg. leucocelaenus</i> |      | <i>Hg. spegazzinii</i> |      | <i>Hg. tropicalis</i> |      |
|-----------------|--------|--------------------------|------|--------------------------|------|------------------------|------|-----------------------|------|
|                 |        | Count                    | RSCU | Count                    | RSCU | Count                  | RSCU | Count                 | RSCU |
| Alanine (A)     | GCU    | 100                      | 2.58 | 93                       | 2.45 | 99                     | 2.51 | 75                    | 2.11 |
|                 | GCC    | 6                        | 0.15 | 9                        | 0.24 | 5                      | 0.13 | 11                    | 0.31 |
|                 | GCA    | 47                       | 1.21 | 46                       | 1.21 | 50                     | 1.27 | 54                    | 1.52 |
|                 | GCG    | 2                        | 0.05 | 4                        | 0.11 | 4                      | 0.10 | 2                     | 0.06 |
| Arginine (R)    | CGU    | 14                       | 1.00 | 12                       | 0.87 | 10                     | 0.71 | 15                    | 1.11 |
|                 | CGC    | 0                        | 0.00 | 1                        | 0.07 | 1                      | 0.07 | 3                     | 0.22 |
|                 | CGA    | 40                       | 2.86 | 38                       | 2.76 | 45                     | 3.21 | 32                    | 2.37 |
|                 | CGG    | 2                        | 0.14 | 4                        | 0.29 | 0                      | 0.00 | 4                     | 0.30 |
| Aspartate (D)   | GAU    | 66                       | 1.97 | 60                       | 1.82 | 67                     | 1.97 | 60                    | 1.88 |
|                 | GAC    | 1                        | 0.03 | 6                        | 0.18 | 1                      | 0.03 | 4                     | 0.13 |
| Asparagine (N)  | AAU    | 196                      | 1.90 | 191                      | 1.85 | 198                    | 1.94 | 213                   | 1.98 |
|                 | AAC    | 10                       | 0.10 | 15                       | 0.15 | 6                      | 0.06 | 2                     | 0.02 |
| Cysteine (C)    | UGU    | 35                       | 1.89 | 36                       | 1.89 | 36                     | 1.95 | 36                    | 2.00 |
|                 | UGC    | 2                        | 0.11 | 2                        | 0.11 | 1                      | 0.05 | 0                     | 0.00 |
| Glutamine (Q)   | CAA    | 70                       | 1.92 | 73                       | 1.95 | 73                     | 1.97 | 72                    | 1.95 |
|                 | CAG    | 3                        | 0.08 | 2                        | 0.05 | 1                      | 0.03 | 2                     | 0.05 |
| Glutamate (E)   | GAA    | 77                       | 1.97 | 74                       | 1.90 | 77                     | 1.97 | 76                    | 1.95 |
|                 | GAG    | 1                        | 0.03 | 4                        | 0.10 | 1                      | 0.03 | 2                     | 0.05 |
| Glycine (G)     | GGU    | 54                       | 1.02 | 50                       | 0.93 | 46                     | 0.86 | 56                    | 1.05 |
|                 | GGC    | 2                        | 0.04 | 2                        | 0.04 | 2                      | 0.04 | 3                     | 0.06 |
|                 | GGA    | 132                      | 2.49 | 137                      | 2.56 | 138                    | 2.57 | 136                   | 2.54 |
|                 | GGG    | 24                       | 0.45 | 25                       | 0.47 | 29                     | 0.54 | 19                    | 0.36 |
| Histidine (H)   | CAU    | 71                       | 1.82 | 61                       | 1.61 | 68                     | 1.74 | 68                    | 1.79 |
|                 | CAC    | 7                        | 0.18 | 15                       | 0.39 | 10                     | 0.26 | 8                     | 0.21 |
| Isoleucine (I)  | AUU    | 362                      | 1.96 | 370                      | 1.91 | 362                    | 1.97 | 373                   | 1.94 |
|                 | AUC    | 8                        | 0.04 | 17                       | 0.09 | 6                      | 0.03 | 11                    | 0.06 |
| Leucine (L) UUN | UUA    | 529                      | 5.47 | 496                      | 5.17 | 529                    | 5.50 | 520                   | 5.33 |
|                 | UUG    | 12                       | 0.12 | 25                       | 0.26 | 7                      | 0.07 | 12                    | 0.12 |
| Leucine (L) CUN | CUU    | 24                       | 0.25 | 29                       | 0.30 | 27                     | 0.28 | 28                    | 0.29 |
|                 | CUC    | 0                        | 0.00 | 1                        | 0.01 | 1                      | 0.01 | 3                     | 0.03 |
|                 | CUA    | 13                       | 0.13 | 25                       | 0.26 | 13                     | 0.14 | 21                    | 0.22 |
|                 | CUG    | 2                        | 0.02 | 0                        | 0.00 | 0                      | 0.00 | 1                     | 0.01 |
| Lysine (K)      | AAA    | 87                       | 1.91 | 83                       | 1.82 | 79                     | 1.74 | 88                    | 1.87 |
|                 | AAG    | 4                        | 0.09 | 8                        | 0.18 | 12                     | 0.26 | 6                     | 0.13 |
| Methionine (M)  | AUA    | 218                      | 1.90 | 219                      | 1.88 | 222                    | 1.93 | 239                   | 1.93 |
|                 | AUG    | 11                       | 0.10 | 14                       | 0.12 | 8                      | 0.07 | 9                     | 0.07 |

|                            |            |      |      |      |      |      |      |      |      |
|----------------------------|------------|------|------|------|------|------|------|------|------|
| <b>Phenylalanine (F)</b>   | <b>UUU</b> | 351  | 1.93 | 341  | 1.85 | 341  | 1.89 | 350  | 1.96 |
|                            | <b>UUC</b> | 12   | 0.07 | 28   | 0.15 | 19   | 0.11 | 8    | 0.04 |
| <b>Proline (P)</b>         | <b>CCU</b> | 82   | 2.58 | 84   | 2.63 | 91   | 2.87 | 75   | 2.36 |
|                            | <b>CCC</b> | 13   | 0.41 | 8    | 0.25 | 7    | 0.22 | 12   | 0.38 |
|                            | <b>CCA</b> | 32   | 1.01 | 35   | 1.09 | 29   | 0.91 | 38   | 1.20 |
|                            | <b>CCG</b> | 0    | 0.00 | 1    | 0.03 | 0    | 0.00 | 2    | 0.06 |
| <b>Serine (S) AGN</b>      | <b>AGU</b> | 45   | 1.15 | 41   | 1.05 | 45   | 1.13 | 39   | 0.99 |
|                            | <b>AGC</b> | 2    | 0.05 | 2    | 0.05 | 0    | 0.00 | 3    | 0.08 |
|                            | <b>AGA</b> | 64   | 1.63 | 65   | 1.66 | 68   | 1.71 | 67   | 1.70 |
|                            | <b>AGG</b> | 0    | 0.00 | 0    | 0.00 | 0    | 0.00 | 0    | 0.00 |
| <b>Serine (S) UCN</b>      | <b>UCU</b> | 108  | 2.75 | 115  | 2.94 | 104  | 2.62 | 95   | 2.41 |
|                            | <b>UCC</b> | 3    | 0.08 | 5    | 0.13 | 9    | 0.23 | 9    | 0.23 |
|                            | <b>UCA</b> | 91   | 2.32 | 84   | 2.15 | 90   | 2.26 | 100  | 2.54 |
|                            | <b>UCG</b> | 1    | 0.03 | 1    | 0.03 | 2    | 0.05 | 2    | 0.05 |
| <b>Threonine (T)</b>       | <b>ACU</b> | 93   | 2.00 | 99   | 2.19 | 92   | 2.02 | 87   | 1.94 |
|                            | <b>ACC</b> | 4    | 0.09 | 13   | 0.29 | 4    | 0.09 | 7    | 0.16 |
|                            | <b>ACA</b> | 88   | 1.89 | 68   | 1.50 | 86   | 1.89 | 85   | 1.90 |
|                            | <b>ACG</b> | 1    | 0.02 | 1    | 0.02 | 0    | 0.00 | 0    | 0.00 |
| <b>Tryptophan (W)</b>      | <b>UGA</b> | 96   | 1.94 | 93   | 1.86 | 95   | 1.92 | 98   | 1.96 |
|                            | <b>UGG</b> | 3    | 0.06 | 7    | 0.14 | 4    | 0.08 | 2    | 0.04 |
| <b>Tyrosine (Y)</b>        | <b>UAU</b> | 151  | 1.96 | 144  | 1.89 | 150  | 1.91 | 149  | 1.92 |
|                            | <b>UAC</b> | 3    | 0.04 | 8    | 0.11 | 7    | 0.09 | 6    | 0.08 |
| <b>Valine (V)</b>          | <b>GUU</b> | 79   | 1.93 | 67   | 1.71 | 83   | 1.92 | 69   | 1.86 |
|                            | <b>GUC</b> | 2    | 0.05 | 5    | 0.13 | 6    | 0.14 | 6    | 0.16 |
|                            | <b>GUA</b> | 81   | 1.98 | 81   | 2.06 | 80   | 1.85 | 70   | 1.89 |
|                            | <b>GUG</b> | 2    | 0.05 | 4    | 0.10 | 4    | 0.09 | 3    | 0.08 |
| <b>Total codons in use</b> |            | 3639 |      | 3647 |      | 3650 |      | 3646 |      |

**Supplementary Table 9. Matrix of nucleotide distances between the taxa used in this study, built by Maximum Composite Likelihood.**

|                                                  | 1    | 2    | 3    | 4    | 5    | 6    | 7    | 8    | 9           | 10          | 11          | 12          | 13          | 14   | 15   | 16   | 17   | 18   | 19   | 20   | 21   | 22   | 23   | 24   | 25   | 26   |
|--------------------------------------------------|------|------|------|------|------|------|------|------|-------------|-------------|-------------|-------------|-------------|------|------|------|------|------|------|------|------|------|------|------|------|------|
| 1 <i>Culex camposi</i> NC036008                  |      |      |      |      |      |      |      |      |             |             |             |             |             |      |      |      |      |      |      |      |      |      |      |      |      |      |
| 2 <i>Culex coronator</i> NC036006                | 0,01 |      |      |      |      |      |      |      |             |             |             |             |             |      |      |      |      |      |      |      |      |      |      |      |      |      |
| 3 <i>Culex pipiens pipiens</i> NC015079          | 0,06 | 0,07 |      |      |      |      |      |      |             |             |             |             |             |      |      |      |      |      |      |      |      |      |      |      |      |      |
| 4 <i>Culex quinquefasciatus</i> NC014574         | 0,08 | 0,09 | 0,04 |      |      |      |      |      |             |             |             |             |             |      |      |      |      |      |      |      |      |      |      |      |      |      |
| 5 <i>Lutzia fuscanus</i> MH316118                | 0,08 | 0,08 | 0,09 | 0,10 |      |      |      |      |             |             |             |             |             |      |      |      |      |      |      |      |      |      |      |      |      |      |
| 6 <i>Lutzia halifaxii</i> MH316119               | 0,09 | 0,09 | 0,09 | 0,11 | 0,04 |      |      |      |             |             |             |             |             |      |      |      |      |      |      |      |      |      |      |      |      |      |
| 7 <i>Aedes aegypti</i> NC035159                  | 0,14 | 0,14 | 0,14 | 0,10 | 0,14 | 0,14 |      |      |             |             |             |             |             |      |      |      |      |      |      |      |      |      |      |      |      |      |
| 8 <i>Aedes albopictus</i> NC006817               | 0,15 | 0,15 | 0,15 | 0,14 | 0,15 | 0,15 | 0,12 |      |             |             |             |             |             |      |      |      |      |      |      |      |      |      |      |      |      |      |
| 9 <i>Haemagogus albomaculatus</i> MN531846       | 0,13 | 0,13 | 0,13 | 0,13 | 0,13 | 0,13 | 0,12 | 0,13 |             |             |             |             |             |      |      |      |      |      |      |      |      |      |      |      |      |      |
| 10 <i>Haemagogus spegazzinii</i> MN531848        | 0,13 | 0,13 | 0,13 | 0,13 | 0,13 | 0,13 | 0,12 | 0,13 | 0,05        |             |             |             |             |      |      |      |      |      |      |      |      |      |      |      |      |      |
| 11 <b><i>Haemagogus janthinomys</i> NC028025</b> | 0,13 | 0,13 | 0,13 | 0,12 | 0,13 | 0,13 | 0,12 | 0,12 | <b>0,05</b> | <b>0,06</b> |             |             |             |      |      |      |      |      |      |      |      |      |      |      |      |      |
| 12 <i>Haemagogus leucocelaenus</i> MN531847      | 0,14 | 0,14 | 0,14 | 0,14 | 0,14 | 0,14 | 0,13 | 0,14 | 0,09        | 0,09        | <b>0,09</b> |             |             |      |      |      |      |      |      |      |      |      |      |      |      |      |
| 13 <i>Haemagogus tropicalis</i> MN531849         | 0,14 | 0,14 | 0,14 | 0,14 | 0,14 | 0,14 | 0,14 | 0,14 | 0,10        | 0,10        | <b>0,10</b> | 0,11        |             |      |      |      |      |      |      |      |      |      |      |      |      |      |
| 14 <i>Psorophora ferox</i> MK575485              | 0,12 | 0,12 | 0,13 | 0,13 | 0,13 | 0,13 | 0,13 | 0,14 | 0,12        | 0,12        | 0,12        | 0,13        | 0,14        |      |      |      |      |      |      |      |      |      |      |      |      |      |
| 15 <i>Psorophora saeva</i> NC044658              | 0,13 | 0,13 | 0,13 | 0,13 | 0,13 | 0,13 | 0,13 | 0,14 | 0,11        | 0,12        | 0,12        | 0,13        | 0,13        | 0,09 |      |      |      |      |      |      |      |      |      |      |      |      |
| 16 <i>Sabethes belisarioi</i> NC037498           | 0,16 | 0,16 | 0,17 | 0,17 | 0,16 | 0,16 | 0,18 | 0,17 | 0,15        | 0,15        | 0,15        | 0,16        | 0,16        | 0,17 | 0,16 |      |      |      |      |      |      |      |      |      |      |      |
| 17 <i>Sabethes chloropterus</i> NC037499         | 0,18 | 0,18 | 0,18 | 0,18 | 0,18 | 0,18 | 0,19 | 0,19 | 0,17        | 0,17        | 0,17        | 0,18        | 0,18        | 0,18 | 0,18 | 0,13 |      |      |      |      |      |      |      |      |      |      |
| 18 <i>Sabethes glaucodaemon</i> NC037500         | 0,17 | 0,17 | 0,17 | 0,17 | 0,17 | 0,17 | 0,17 | 0,17 | 0,15        | 0,15        | 0,15        | 0,16        | 0,16        | 0,17 | 0,16 | 0,11 | 0,10 |      |      |      |      |      |      |      |      |      |
| 19 <i>Sabethes undosus</i> NC044660              | 0,17 | 0,18 | 0,18 | 0,18 | 0,17 | 0,17 | 0,18 | 0,18 | 0,16        | 0,16        | 0,16        | 0,17        | 0,17        | 0,17 | 0,17 | 0,12 | 0,12 | 0,11 |      |      |      |      |      |      |      |      |
| 20 <i>Anopheles albitarsis</i> NC020662          | 0,17 | 0,17 | 0,17 | 0,17 | 0,17 | 0,18 | 0,18 | 0,18 | 0,17        | 0,17        | 0,17        | 0,18        | 0,18        | 0,17 | 0,18 | 0,20 | 0,21 | 0,19 | 0,20 |      |      |      |      |      |      |      |
| 21 <i>Anopheles darlingi</i> NC014275            | 0,17 | 0,17 | 0,17 | 0,17 | 0,17 | 0,17 | 0,17 | 0,17 | 0,17        | 0,17        | 0,16        | 0,17        | 0,17        | 0,17 | 0,17 | 0,19 | 0,21 | 0,19 | 0,20 | 0,08 |      |      |      |      |      |      |
| 22 <i>Anopheles gambiae</i> NC002084             | 0,16 | 0,17 | 0,17 | 0,17 | 0,17 | 0,17 | 0,17 | 0,18 | 0,17        | 0,17        | 0,17        | 0,18        | 0,18        | 0,17 | 0,17 | 0,19 | 0,21 | 0,19 | 0,20 | 0,13 | 0,12 |      |      |      |      |      |
| 23 <i>Anopheles quadrimaculatus</i> NC000875     | 0,17 | 0,17 | 0,17 | 0,18 | 0,17 | 0,17 | 0,18 | 0,18 | 0,17        | 0,17        | 0,17        | 0,18        | 0,19        | 0,18 | 0,17 | 0,20 | 0,21 | 0,20 | 0,21 | 0,13 | 0,13 | 0,12 |      |      |      |      |
| 24 <i>Anopheles bellator</i> NC030249            | 0,18 | 0,18 | 0,18 | 0,18 | 0,18 | 0,18 | 0,18 | 0,19 | 0,17        | 0,18        | 0,18        | 0,18        | 0,19        | 0,18 | 0,18 | 0,19 | 0,20 | 0,19 | 0,20 | 0,14 | 0,14 | 0,14 | 0,14 |      |      |      |
| 25 <i>Anopheles cruzii</i> NC024740              | 0,17 | 0,18 | 0,18 | 0,18 | 0,18 | 0,18 | 0,18 | 0,18 | 0,17        | 0,17        | 0,17        | 0,18        | 0,18        | 0,18 | 0,18 | 0,19 | 0,20 | 0,19 | 0,20 | 0,14 | 0,13 | 0,14 | 0,14 | 0,07 |      |      |
| 26 <i>Anopheles homunculus</i> NC030248          | 0,18 | 0,18 | 0,18 | 0,18 | 0,18 | 0,18 | 0,18 | 0,19 | 0,17        | 0,17        | 0,18        | 0,18        | 0,18        | 0,19 | 0,18 | 0,19 | 0,21 | 0,20 | 0,20 | 0,14 | 0,14 | 0,14 | 0,14 | 0,07 | 0,07 |      |
| 27 <b><i>Dixella aestivalis</i> NC029354</b>     | 0,26 | 0,26 | 0,26 | 0,27 | 0,26 | 0,26 | 0,27 | 0,27 | <b>0,25</b> | <b>0,26</b> | 0,26        | <b>0,26</b> | <b>0,26</b> | 0,26 | 0,27 | 0,27 | 0,28 | 0,27 | 0,28 | 0,26 | 0,26 | 0,26 | 0,26 | 0,26 | 0,26 | 0,26 |

**Taxon with the lowest mean nucleotide divergence compared to sequenced *Hg. spp.***

**Taxon with the highest mean nucleotide divergence compared to sequenced *Hg. spp.***

*Hg. albomaculatus*

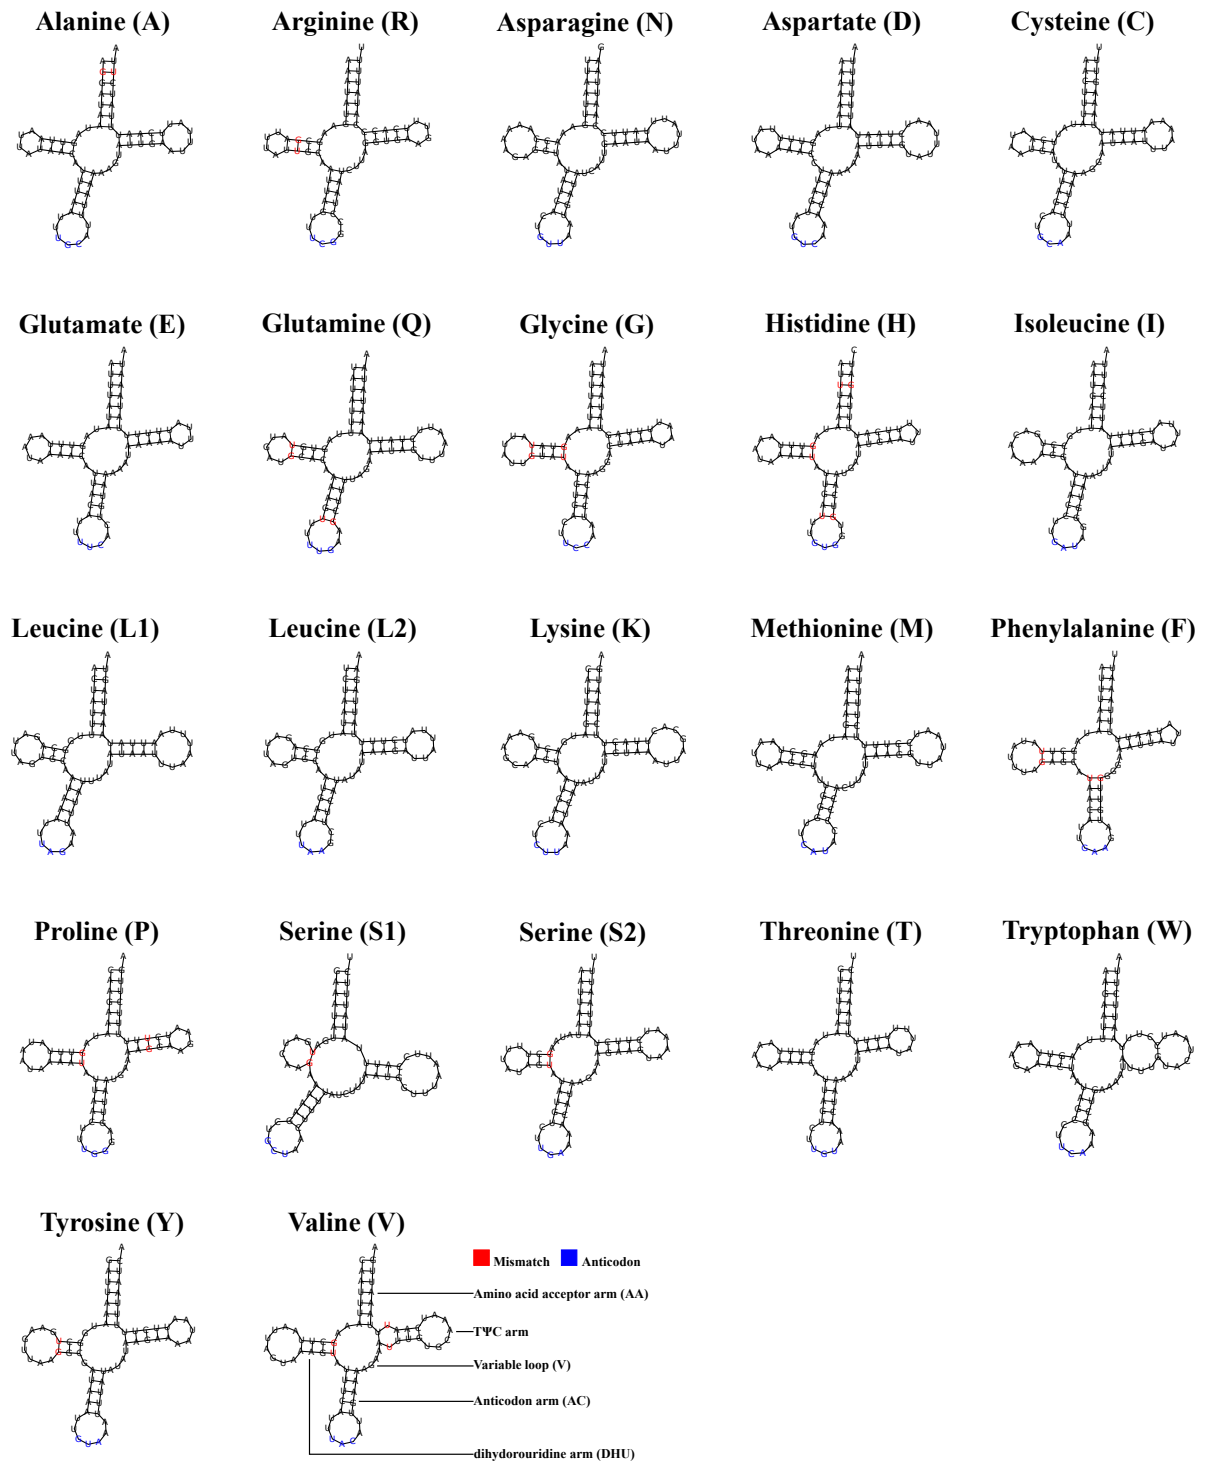

Supplementary Figure 1. Predicted secondary structure of tRNAs of *Hg. albomaculatus*.

*Hg. leucocelaenus*

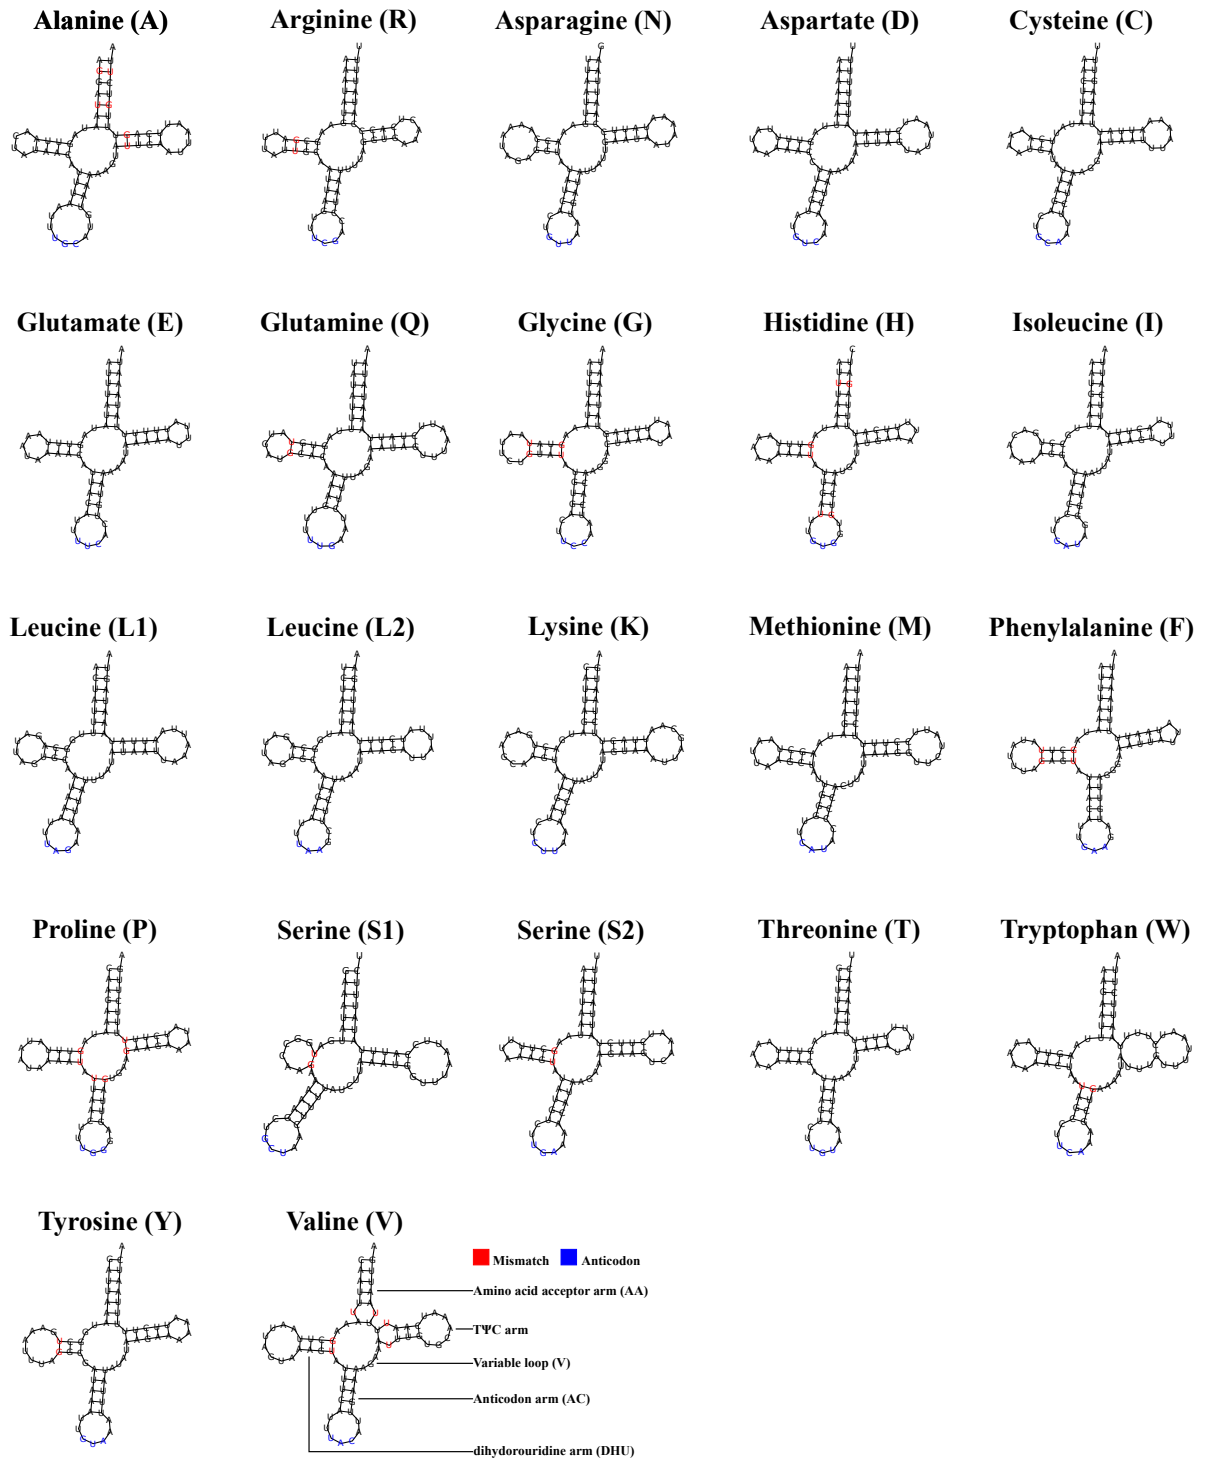

Supplementary Figure 2. Predicted secondary structure of tRNAs of *Hg. leucocelaenus*.





*Hg. tropicalis*

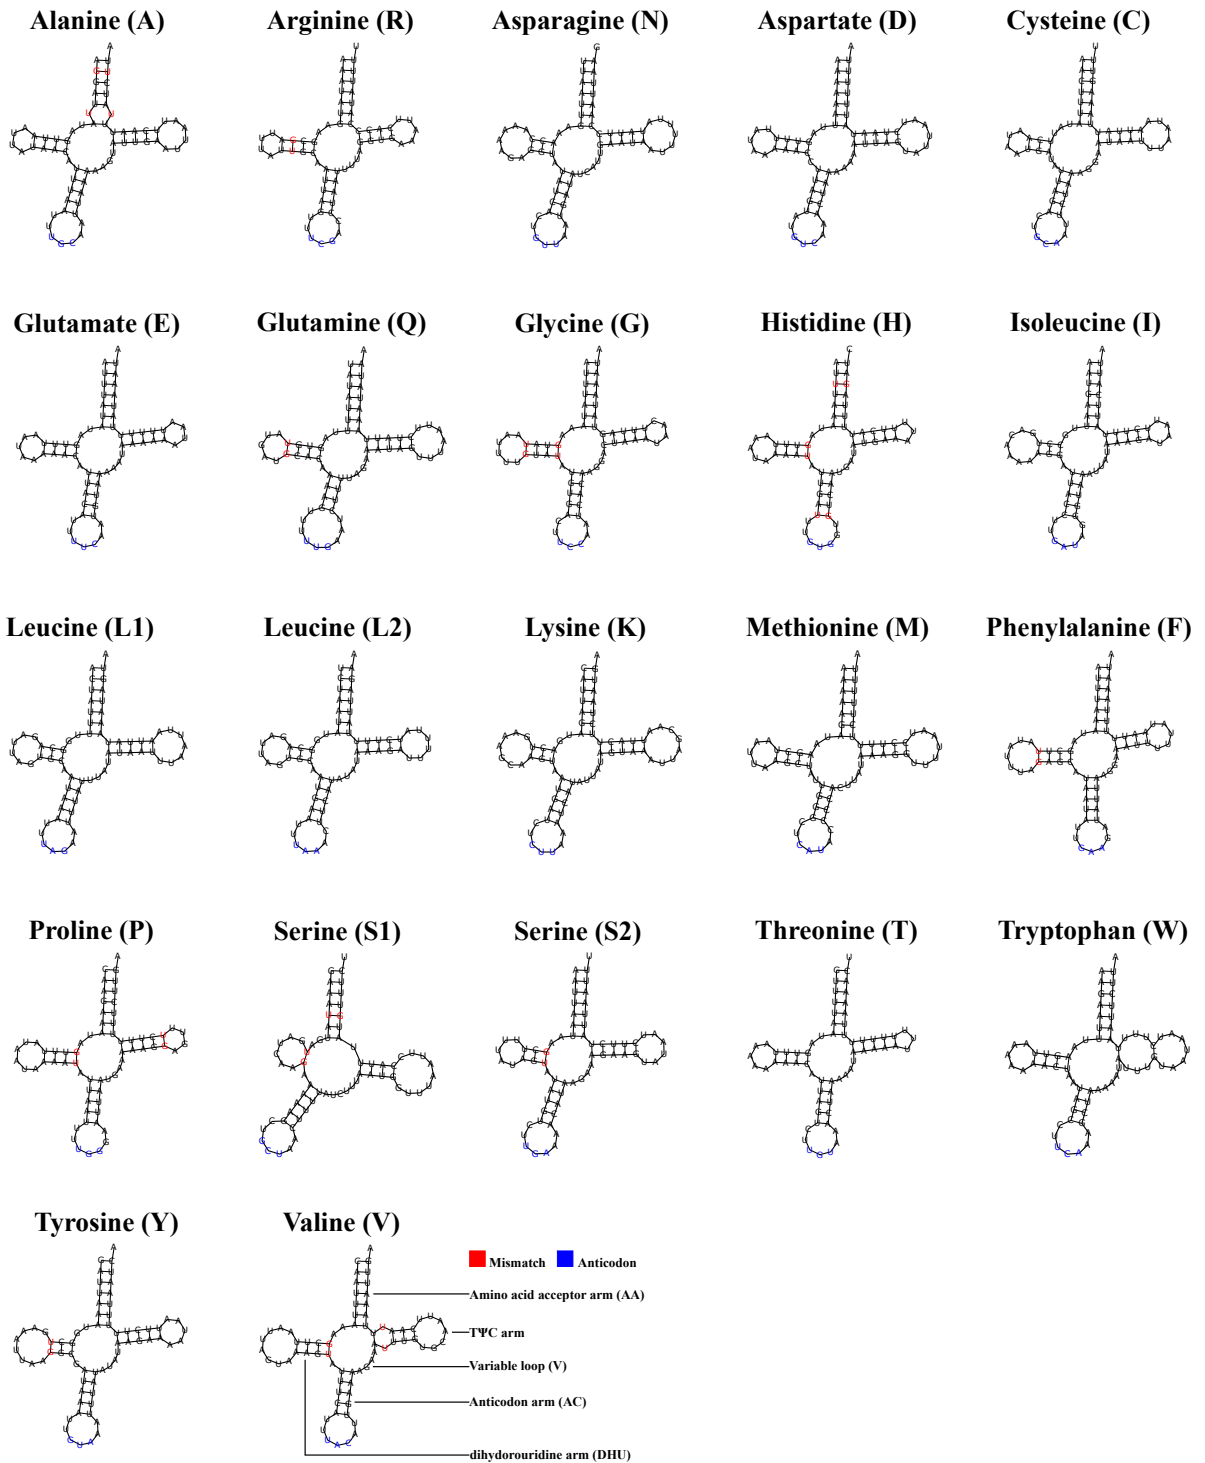

Supplementary Figure 4. Predicted secondary structure of tRNAs of *Hg. tropicalis*.

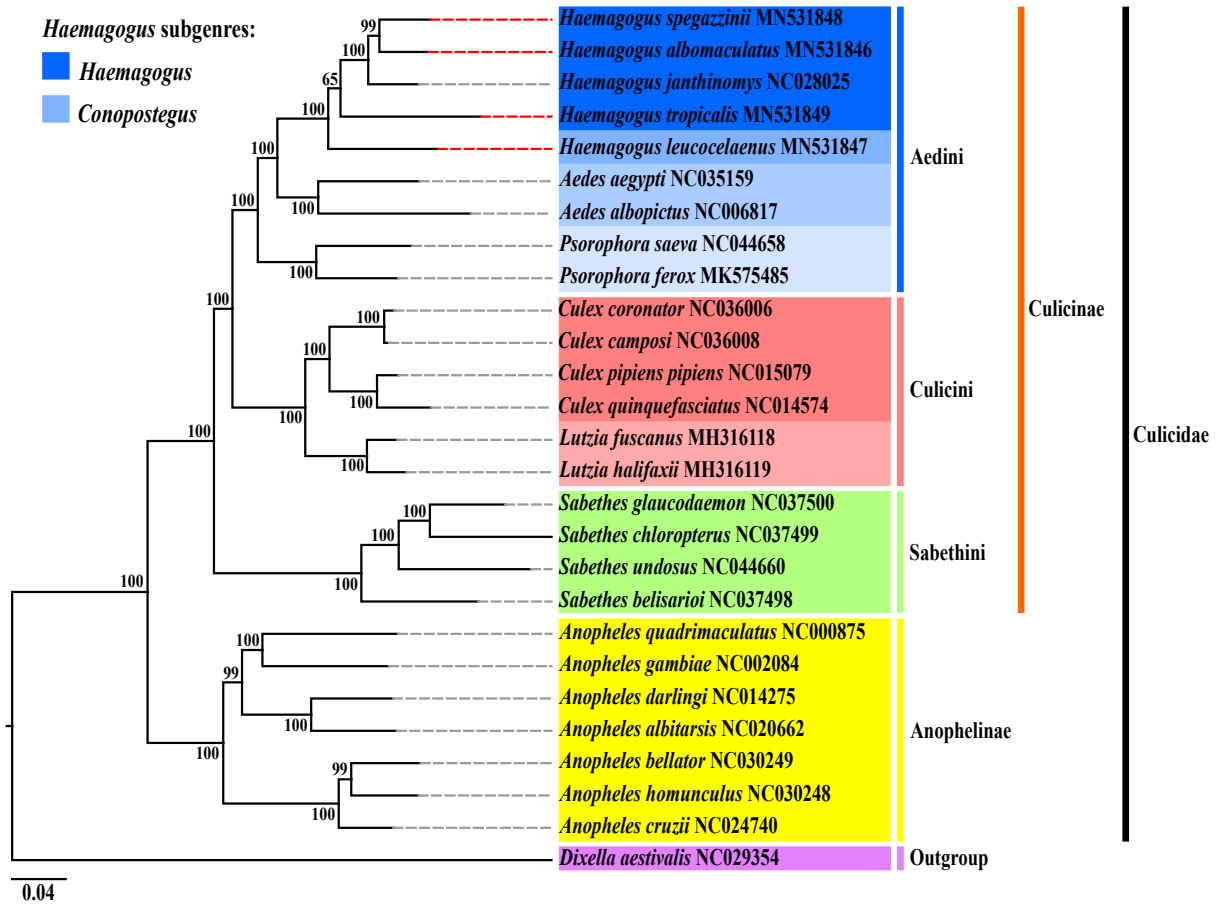

**Supplementary Figure 5. Phylogenetic reconstruction by the Bayesian Inference**

**method, based on the concatenation of the 13 PCGs of the *Haemagogus* species sequenced in this study and 23 other taxa with data available on GenBank database. The subsequent Bayesian probabilities (BP) are shown on the left, in each node. The complementary lines dotted in red indicate the newly-sequenced species.**

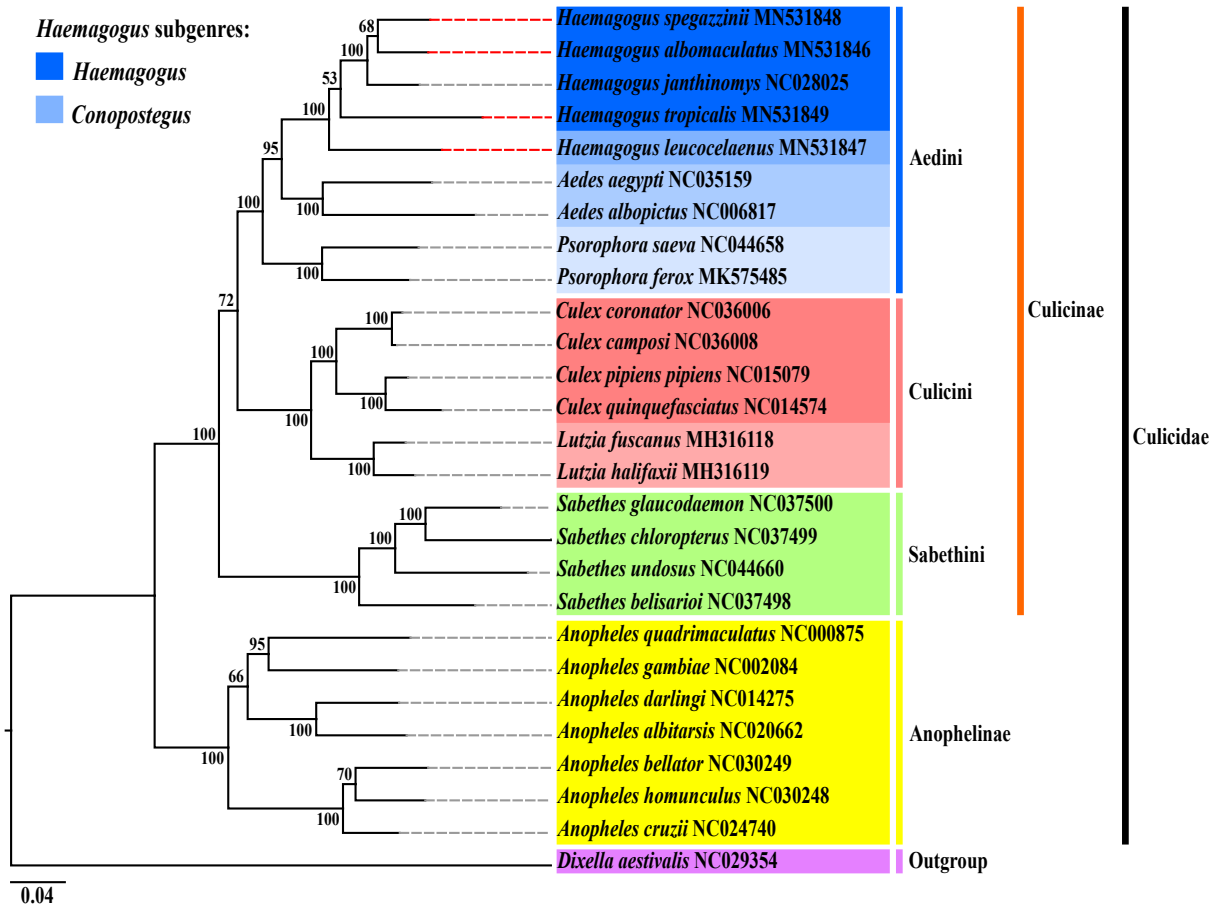

**Supplementary Figure 6. Phylogenetic reconstruction by the Maximum Likelihood methods, based on the concatenation of the 13 PCGs of the *Haemagogus* species sequenced in this study and 23 other taxa with data available on GenBank database. The values of support for bootstrapping (BPP) for 1,000 replicates are shown on the left, in each node. The complementary lines dotted in red indicate the newly-sequenced species.**

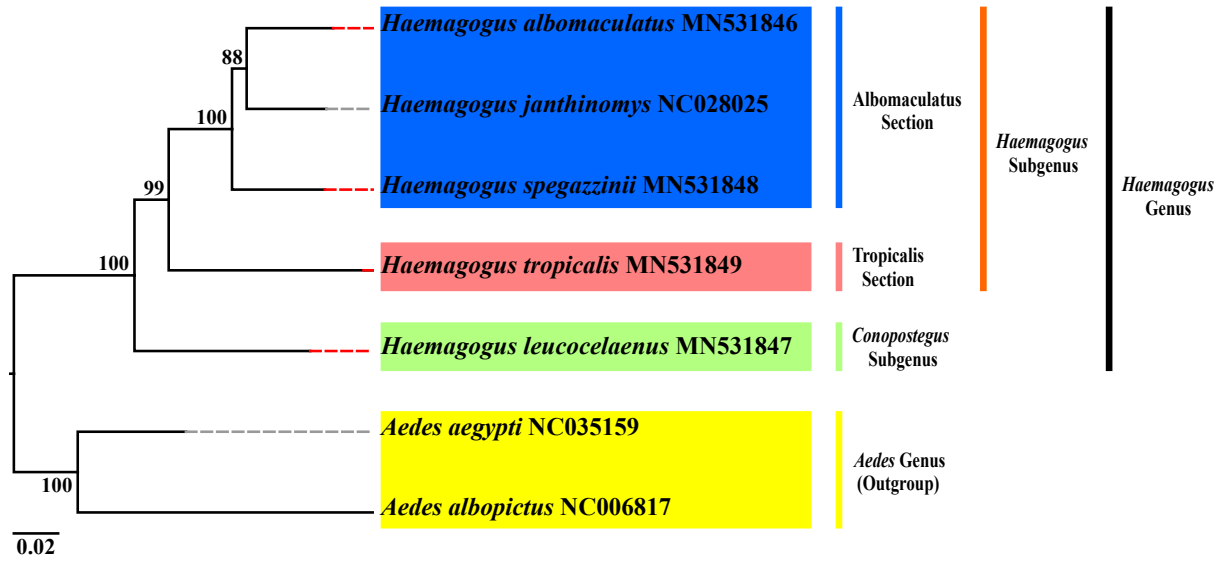

**Supplementary Figure 7. Phylogenetic reconstruction by the Bayesian Inference**

method, based on the concatenation of the genes *ATP8*, *COI*, *ND5*, and *ND6* of the *Haemagogus* species sequenced in this study and 03 other taxa with data available on GenBank database. The subsequent Bayesian probabilities (BP) are shown on the left, in each node. The complementary lines dotted in red indicate the newly-sequenced species.

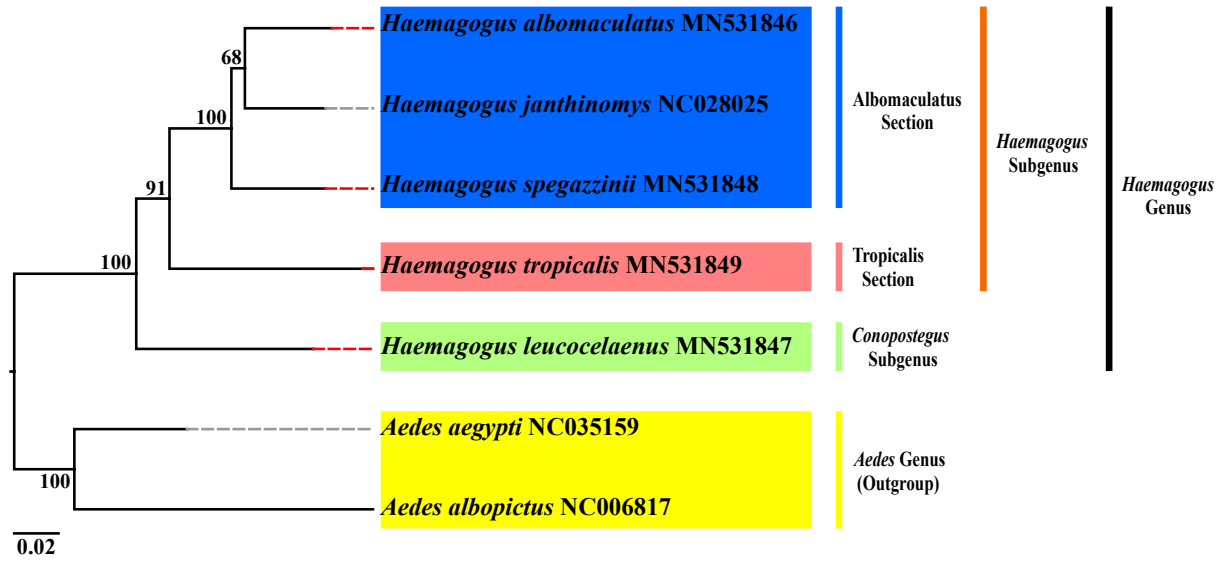

**Supplementary Figure 8. Phylogenetic reconstruction by the Maximum Likelihood**

**methods, based on the concatenation of the genes *ATP8*, *COI*, *ND5*, and *ND6* of the *Haemagogus* species sequenced in this study and 03 other taxa with data available on GenBank database. The values of support for bootstrapping (BPP) for 1,000 replicates are shown on the left, in each node. The complementary lines dotted in red indicate the newly-sequenced species.**
